# Supplementary material for: Room temperature phosphorescence of the biocompatible B2O3/SiO2 nanocomposite and its application for cellular imaging
Source: Royal Society of Chemistry journal article supplement (doi:10.1039/c4ay01115e), 2014-01-01
Supplement: c4ay01115e1.pdf [file c4ay01115e1.pdf]

## Supporting information

The phosphorescence intensities and experimental conditions are summarized in Fig.S-1. It is clear that the emission intensity change with the experimental conditions and increases apparently with the B/Si molar ratio increasing from 1/9 to 1/3. When the B/Si molar ratio is 2/3, the maximal phosphorescence intensities was obtained when calcined at 650 °C for 2 hours, which was coincident with the sample obtained when the B/Si molar ratio is 1/3 and calcined at 550 °C for 3 hours (as shown in Fig. S-3). Furthermore, black solid material without PP will be obtained when the boron concentration above 40%. Therefore, the sample used in this paper was obtained when the B/Si molar ratio is 1/3 and calcined at 550 °C for 3 hours.

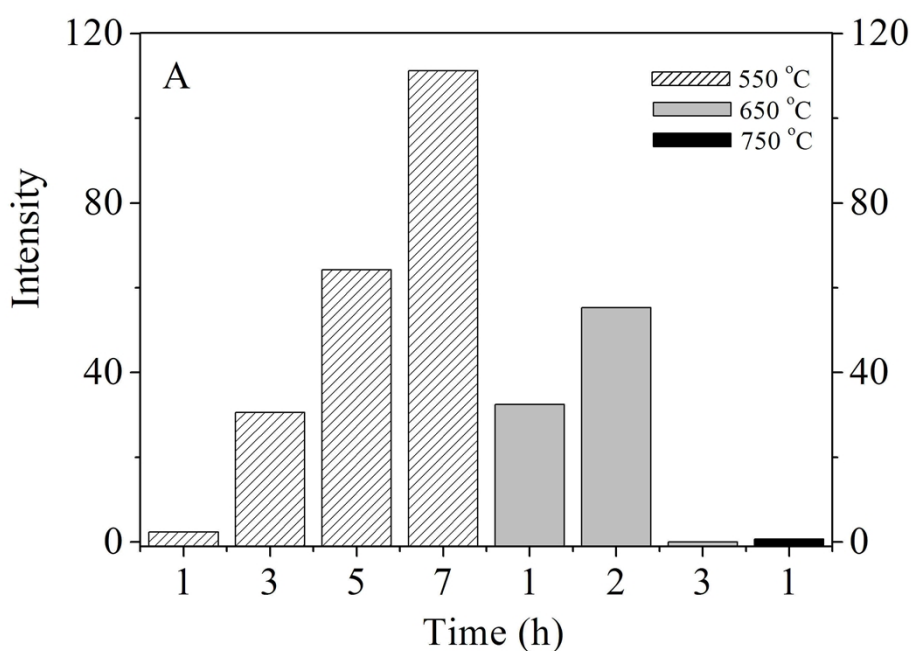

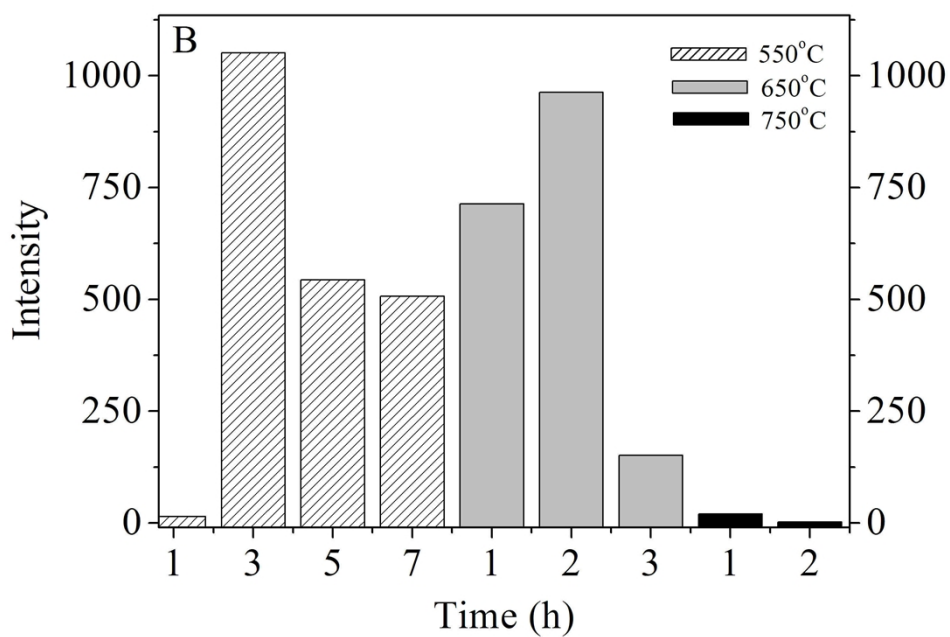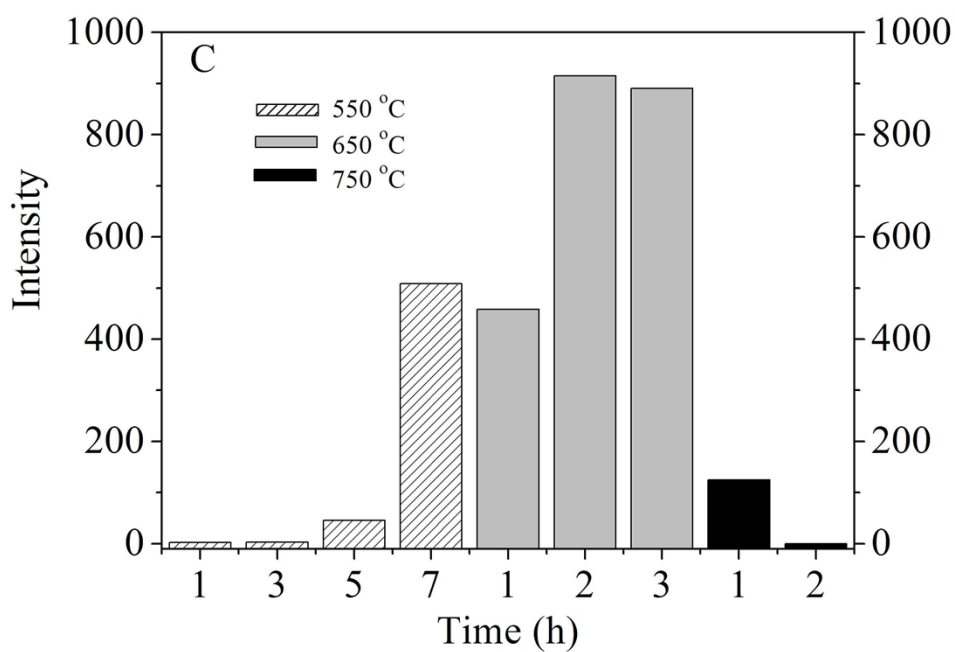

Fig.S-1 the phosphorescence emission intensity obtained at 540 nm under different calcination temperature and durations. (A) B/Si molar ratio is 1/9; (B) B/Si molar ratio is 1/3; (A) B/Si molar ratio is 2/3.

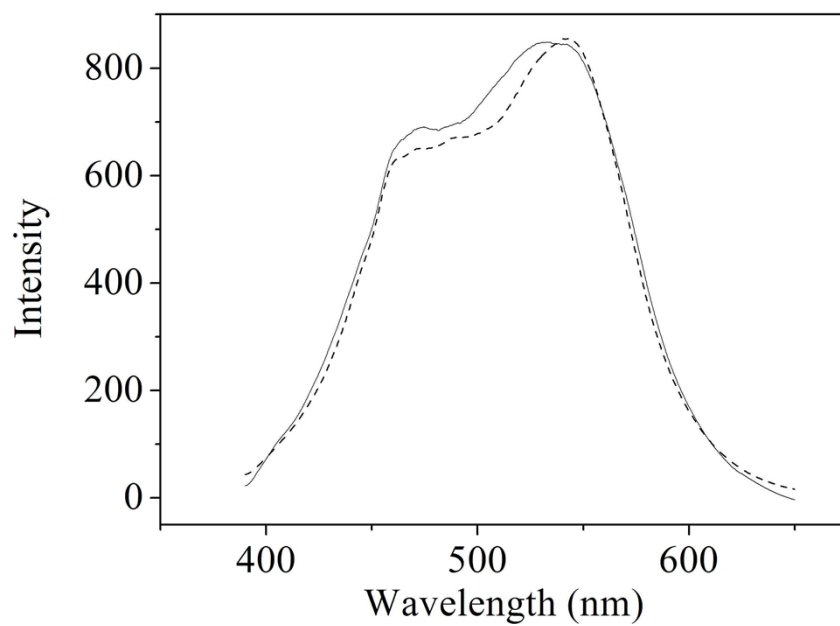

Fig. S-2 Room temperature phosphorescence emission spectrum of the obtained solid. Dash line: B/Si molar ratio is 1/3 and the calcination was performed at 550°C for 3 hour; solid line: B/Si molar ratio is 40% and the calcination was performed at 650°C for 2 hour.
